# Supplementary material
Source: PubMed Central journal article supplement (PMC1559747)
Supplement: pnas_0605652103_5.pdf [file pnas_0605652103_5.pdf]

**Table 2. Primers used for cloning of N-terminal constructs of IGFBP4 and C-terminals of IGFBP4 and IGFBP1**

| No. | Name          | Nucleotide sequence                                                                        |
|-----|---------------|--------------------------------------------------------------------------------------------|
| 1   | NBP4D1XaF     | <b>CGCGGATCC</b> <u>ATTGAGGGTCGCG</u> <b>GACGAAGCCATCCACTGCC</b><br><b>CGCCC</b>           |
| 2   | NBP4_BP1XaF   | <b>CGCGGATCC</b> <u>ATTGAGGGTCGCG</u> <b>GCCGTGGCACTGCCCCGCC</b><br><b>CTGCTCCGAGGAG</b>   |
| 3   | NBP4_BP3XaF1  | <b>AGCAGCGGCGGCTTTGGTCCGGTGGTGC</b> <b>ACTGCCCCGCCCTG</b><br><b>CTCCGAGGAGAAG</b>          |
| 4   | NBP4_BP3XaF2  | <b>CGCGGATCC</b> <u>ATTGAGGGTCGCG</u> <b>GCGGAGCAGCGGCGGCT</b><br><b>TTGGTCCGGTGGTG</b>    |
| 5   | NBP4cons3XaF1 | <b>GCTGTGGGCCTGGGTCCGGTGGTGC</b> <b>GTTGCCCGCCCTGCTC</b><br><b>CGAGGAGAAGCTG</b>           |
| 6   | NBP4cons3XaF2 | <b>CGCGGATCC</b> <u>CAGCATTGAGGGTCGCG</u> <b>GGTGCCGGCGCTGTGG</b><br><b>GCCTGGGTCCGGTG</b> |
| 7   | NBP4G5XaF     | <b>CGCGGATCC</b> <u>ATTGAGGGTCGCG</u> <b>GCTGCCCGCCCTGCTCCGA</b><br><b>GGAGAAGC</b>        |
| 8   | NBP4L82R      | <b>CCCAAGCTT</b> <i><b>TCATTACAGCTCCATGCACACGCCTTGCCCCG</b></i>                            |
| 9   | NBP4L92R      | <b>CCCCTCGAGT</b> <i><b>CATTACAGGCTTTCCTGGATGGCCTCGATCTC</b></i>                           |
| 10  | CBP4XaF       | <b>CGCGGATCC</b> <u>ATTGAGGGTCGCT</u> <b>GCCAGAGCGAGCTGCACC-</b><br><b>GGG</b>             |
| 11  | CBP4R         | <b>CCGCTCGAGT</b> <i><b>CATTACAGCTCCATGCACACGCCTTGCCCCG</b></i>                            |
| 12  | CBP1XaF       | <b>CGCGAATTC</b> <u>ATCGAAGGTCGTG</u> <b>TACCAACATCAAAAAAT</b><br><b>GGAAGG</b>            |
| 13  | CBP1R         | <b>CGCCTCCGAGT</b> <i><b>TAGTTTTGTACATTAATAATATATCTGGC</b></i>                             |

F, forward; R, reverse. Restriction sites are in **boldface** type, stop codons are in italics, and encoded protease-cleavage sites are underlined.
